# Supplementary material for: Persistence in soil of Miscanthus biochar in laboratory and field conditions
Source: PLoS One. 2017 Sep 5;12(9):e0184383. doi: 10.1371/journal.pone.0184383 (PMC5584961; doi:10.1371/journal.pone.0184383)
Supplement: S2 Table — (PDF) [file pone.0184383.s004.pdf]

1 S2 Table. Two-way ANOVA factorial analysis of biochar type  $\times$  dose effects on cumulative priming after  
2 90 days. Amendment type: *Miscanthus* feedstock (MS), BC<sub>MED</sub> and BC<sub>LAB</sub>; amendment dose: high (5.5%  
3 BC<sub>MED</sub> and BC<sub>LAB</sub> and 0.58% MS) and low (1.1% BC<sub>MED</sub> and BC<sub>LAB</sub> and 0.12% MS).

| Source of Variation | <i>F</i> | <i>P</i> |
|---------------------|----------|----------|
| Type                | 190      | <0.001   |
| Dose                | 1321     | <0.001   |
| Type $\times$ Dose  | 80       | <0.001   |

4
