# Supplementary material for: Persistence in soil of Miscanthus biochar in laboratory and field conditions
Source: PLOS journal article supplement (doi:10.1371/journal.pone.0184383), 2017-09-05
Supplement: S3 (10.1371/journal.pone.0184383.s003) [file file]

1 S1 Table. Two-way ANOVA factorial analysis of biochar type  $\times$  dose effects on cumulative  
2 mineralization after 90 days. Biochar type: BC<sub>MED</sub> and BC<sub>LAB</sub>; biochar dose: 0.23, 1.14 or 5.46 % by  
3 weight.

| Source of Variation | <i>F</i> | <i>P</i> |
|---------------------|----------|----------|
| Type                | 5.77     | 0.033    |
| Dose                | 1.69     | 0.226    |
| Type $\times$ Dose  | 1.34     | 0.291    |

4
