# Supplementary material for: Persistence in soil of Miscanthus biochar in laboratory and field conditions
Source: PLOS journal article supplement (doi:10.1371/journal.pone.0184383), 2017-09-05
Supplement: S6 (10.1371/journal.pone.0184383.s006) [file journal.pone.0184383.s006]

1 S4 Table. Analysis of variance for average  $\delta^{13}\text{C}$  of soil  $\text{CO}_2$  in 2012 in the biochar plots (averaged of  
2 BC25 and BC8) *vs.* control plots (n = 4).

| Source of Variation | <i>F</i> | <i>P</i> |
|---------------------|----------|----------|
| Biochar             | 8.23     | 0.064    |
| Block               | 2.66     | 0.222    |

3

4
